# Supplementary material for: Temperate Oligocene surface ocean conditions offshore Cape Adare, Ross Sea, Antarctica
Source: Copernicus journal article supplement (doi:10.5194/cp-2020-139), 2020-11-27
Supplement: Supplementary file 1 [file Supplementary table S1.xlsx]

## Sheet: Sheet1
Supplementary Table S1
Table with a summary of demagnetization data results. Sample identification, Core location indicating core, section and depth (mbsf), Declination, Inclination, Sample intensity (in A/m2), MAD values and remarks including the steps used for interpretation.
sample name	core	section	cm	depth	Declination	Inclination	Intensity	MAD	remarks
ev27	19	2	69	173.2	140.433	23.1422	14.5477	29.057	20-40mT
ev29	19	4	42	175.93	309.764	-42.8114	87.8209	19.5124	30-60mT
ev30	19	5	102	178.03	3.24202	-40.6212	380.555	5.17768	30-100mT
ev31	20	1	72	181.23	123.57	-54.2321	137.821	7.43291	30-80mT
ev32	20	2	96	182.97	112.947	80.8191	49.8989	5.65418	40-120mT
ev33	20	3	22	183.73	201.595	73.1071	38.4234	9.57097	60-200mT
ev34	20	4	39	185.4	278.413	44.9451	14.8544	19.9591	30-60mT
ev35	20	5	87	187.38	203.442	-17.3214	19.0001	12.5488	40-80mT
ev36	20	6	107	189.08	61.1397	-37.3299	226.199	8.49782	30-60mT
ev37	21	1	65	190.66	225.086	21.9082	16.7371	8.78195	60-100mT
ev38	21	1	119	191.2	279.668	20.7543	12.6562	12.2561	10-30mT
ev39	21	2	38	191.89	150.983	-31.3745	7.74964	25.6881	20-60mT
ev40	21	3	128	194.29	35.4307	-14.7919	22.9971	10.1538	60-100mT
ev42	21	5	120	197.21	35.6084	-10.9978	17.8997	6.69719	30-60mT
ev44	22	2	74	201.75	119.508	55.5173	31.5362	12.3357	20-60mT
ev45	22	3	25	202.76	50.5321	86.6039	81.254	3.13855	20-40mT
ev46	22	4	21	204.22	203.575	-22.2494	36.6001	29.4192	20-60mT
ev47	22	5	123	206.74	183.813	58.7187	25.6194	11.9694	20-40mT
ev48	23	1	95	209.96	85.6421	69.338	28.1033	7.69934	20-40mT
ev49	23	1	123	210.24	349.177	40.4869	237.074	3.41646	20-60mT
ev50	23	2	84	211.35	216.747	55.4909	106.43	5.36607	20-80mT
ev51	23	3	121	213.22	277.052	65.9798	33.2011	8.40134	15-80mT
ev52	23	4	52	214.03	338.141	-66.2328	39.2056	14.824	20-100mT
ev53	23	5	124	216.25	153.663	72.36	34.6387	16.6382	30-80mT
ev54	23	6	90	217.41	214.471	-34.5627	66.5665	12.9159	30-80mT
ev55	24	2	19	220.2	24.2732	-0.729453	94084.1	7.64853	30-100mT
ev56	24	3	119	222.7	230.124	-3.099	46.7661	7.72506	30-100mT
ev57	24	4	75	223.76	18.4808	-8.10317	213.301	2.6699	30-100mT
ev58	24	5	103	225.54	218.93	0.15339	23.3226	9.25379	30-80mT
ev59	25	1	38	228.39	32.7382	71.7504	19.7969	11.2328	60-80
ev60	25	2	117	230.68	108.614	52.8251	12.8663	19.2963	30-60
ev61	25	3	102	232.03	186.186	-53.0748	117.925	4.94691	20-60mT
ev62	25	4	11	232.62	342.18	45.327	63.8934	10.2035	20-60mT
ev63	26	1	85	238.36	235.077	-14.1634	31.6349	14.5691	40-100mT
ev64	26	2	27	239.28	131.223	-55.1729	51.6408	11.2135	40-80mT
ev66	26	4	15	242.16	253.022	52.2885	18.5243	10.8956	30-60mT
ev67	26	5	117	244.68	228.696	-37.0549	50.0194	7.24994	15-60mT
ev68	26	6	23	245.24	133.432	55.5331	29.8824	19.7933	30-60mT
ev69	27	1	128	248.29	98.9334	23.0959	13.0114	18.0358	15-30mT
ev70	27	2	112	249.63	220.533	-32.5085	34.3907	12.4169	20-60mT
ev71	27	3	113	251.14	56.3389	31.9785	90.5698	12.2822	60-100mT
ev72	27	4	44	251.95	23.5902	74.5004	24.1241	16.8655	60-80mT
ev73	28	1	89	257.4	359.023	-34.5307	27.5288	8.26722	60-100mT
ev74	28	2	121	259.22	161.707	42.7409	7.66545	17.4129	40-80mT
ev75	28	3	109	260.6	15.7942	45.6529	51.4355	19.9386	30-60mT
ev77	28	4	85	261.86	18.2355	1.52666	9.67028	20.3272	30-100mT
ev78	28	5	137	262.79	145.308	40.069	35.0291	10.3788	20-60mT
ev79	28	6	28	264.29	17.4293	-33.6728	50.9429	7.32193	60-100mT
ev80	28	6	89	264.9	312.714	42.321	10.6575	11.5134	40-80mT
ev81	29	1	148	267.49	228.903	-14.3447	38.6092	8.78898	30-100mT
ev82	29	2	95	268.46	278.464	33.142	186.933	8.31297	15-60mT
ev83	29	3	74	269.75	118.589	-53.1842	20.6499	16.8268	40-80mT
ev84	30	1	93	276.44	217.304	-46.6129	14.5295	20.1656	40-80mT
ev85	30	2	17	277.18	235.584	39.4534	1124.01	7.23973	40-100mT
ev86	30	2	137	278.38	9.23058	20.3724	89.5804	5.20163	30-80mT
ev87	30	3	25	278.76	215.556	55.7383	21.6779	13.8589	40-100mT
ev88	30	4	112	280.63	345.481	-60.5605	12.1553	25.5117	30-60mT
ev89	30	5	91	282	104.623	62.367	127.095	4.75522	30-80mT
ev90	30	6	49	282.42	34.8213	74.0116	38.0935	12.3181	20-100mT
ev91	31	1	127	286.28	133.384	-47.4491	19.3359	10.891	15-60mT
ev92	31	2	11	286.62	154.753	-41.7307	7.16985	26.5284	30-60mT
ev93	31	2	115	287.66	319.972	53.6052	57.5829	5.4078	30-100mT
ev94	31	3	125	289.26	113.831	32.0589	45.039	9.05217	20-60mT
ev95	31	4	45	289.96	220.99	-28.3496	47.2442	8.60599	30-100mT
ev96	31	5	44	291.45	72.185	76.2089	31.7628	9.33148	40-100mT
ev97	31	5	112	292.13	39.9791	61.8249	9.57612	22.0585	0-60mT
ev98	31	6	43	292.94	338.963	14.4889	6.77152	25.0845	20-40mT
ev99	32	1	109	295.6	118.989	-8.34301	14.4738	8.72571	20-40mT
ev100	32	2	23	296.24	205.256	-46.7967	9.4275	27.9032	20-40mT
ev102	32	4	85	299.86	323.175	-21.0575	48.4083	5.39719	60-100mT
ev103	32	5	126	301.77	311.272	-49.7679	18.6622	11.9331	40-100mT
ev104	32	6	20	302.21	180.665	-31.7661	58.0773	10.6723	20-80mT
ev106	33	2	45	305.96	181.713	-87.2378	84.5576	7.57938	15-30mT
ev108	33	3	114	308.15	222.683	28.6782	30.3779	17.969	15-30mT
ev109	33	4	114	309.65	263.17	19.9621	14.9514	11.1064	20-60mT
ev110	34	1	36	313.87	222.367	26.2394	50.0664	7.54202	20-60mT
ev111	34	1	135	314.86	307.683	62.6793	329.873	4.59105	30-100mT
ev113	34	3	115	317.66	3.34025	30.9241	270.764	4.61641	20-80mT
ev114	34	4	139	319.4	120.259	12.6442	68.1892	2.11737	15-30mT
ev115	34	6	34	321.35	54.0911	8.37455	87.6056	4.94997	15-30mT
ev116	34	6	94	321.95	6.96867	-40.3032	29.3276	5.8083	15-30mT
EV1	36	1	119	333.68	331.294	-43.4107	96.3037	25.618	20mT-35mT
EV2	36	2	40	334.41	181.865	4.63808	28.9216	20.7021	20mT-30mT
EV3	36	2	136	335.37	168.985	-48.223	24.7253	11.6306	15mT-30mT
ev4	37	1	21	342.22	263.628	-45.8198	40.6126	9.35463	25mT-40mT
ev5	38	1	140	352.91	181.219	-32.1009	28.2491	47.0435	20mT-45mT
ev6	38	2	54	353.55	121.047	-25.8137	24.0361	15.7532	20mT-35mT
ev7	38	2	135	354.36	180.136	-23.3623	22.6999	22.9676	25mT-40mT
ev8	39	1	49	361.5	171.58	-61.9178	13.1693	11.7373	20mT-30mT
ev9	39	2	93	363.44	99.0836	-62.8271	159.899	9.50116	20mT-35mT
ev10	40	1	64	371.15	149.501	45.4544	139.984	8.12526	25mT-40mT
ev11	40	1	84	371.35	195.276	-28.2113	72.0125	11.4446	15mT-50mT
ev12	41	1	120	381.21	42.4038	-42.5744	38.2431	9.61457	5mT-15mT
ev16	41	3	106	384.07	169.546	-65.7111	33.8823	21.4992	15mT-35mT
ev17	42	1	106	390.57	207.685	-33.3602	27.4966	33.0787	25mT-35mT
ev18	42	2	47	391.48	295.8	-63.1242	65.3088	9.1243	30mT-60mT
ev19	42	2	83	391.84	25.8054	-53.3924	39.0491	23.6533	30mT-90mT
ev20	42	3	18	392.6	221.116	-38.4701	41.2776	14.6926	35mT-60mT
ev21	42	3	100	393.52	183.905	-65.9022	15.436	16.1647	15mT-25mT
ev22	43	1	116	400.17	16.2524	-83.1993	176.791	3.24388	10mT-30mT
ev23	43	2	68	401.19	186.884	46.3103	21.1532	18.6896	40mT-60mT
ev24	43	3	56	402.57	171.276	-41.7392	72.906	24.8842	10mT-20mT
ev25	43	3	113	403.14	132.11	-56.3155	107.512	12.544	20mT-45mT
ev26	43	4	136	404.87	95.6557	66.2058	216.602	5.3508	45mT-90mT

## Sheet: Sheet2
Sample Name	Declination	Inclination	Intensity	MAD	q	tr	remarks
EV27B	140.433	23.1422	14.5477	29.057	2	2	20-40mT
EV29B	309.764	-42.8114	87.8209	19.5124	2	2	30-60mT
EV30B	3.24202	-40.6212	380.555	5.17768	1	1	30-100mT
EV31B	123.57	-54.2321	137.821	7.43291	1	2	30-80mT
EV31B	123.57	-54.2321	137.821	7.43291	2	2	30-80mT
EV32B	112.947	80.8191	49.8989	5.65418	2	1	40-120mT
EV33B	201.595	73.1071	38.4234	9.57097	1	1	60-200mT
EV34B	278.413	44.9451	14.8544	19.9591	2	2	30-60mT
EV35B	203.442	-17.3214	19.0001	12.5488	2	2	40-80mT
EV36B	61.1397	-37.3299	226.199	8.49782	2	2	30-60mT
EV37B	225.086	21.9082	16.7371	8.78195	2	2	60-100mT
EV37B	225.086	21.9082	16.7371	8.78195	2	2	60-100mT
EV38B	279.668	20.7543	12.6562	12.2561	2	2	10-30mT
EV39B	150.983	-31.3745	7.74964	25.6881	2	2	20-60mT
EV40B	35.4307	-14.7919	22.9971	10.1538	2	2	60-100mT
EV42B	35.6084	-10.9978	17.8997	6.69719	2	2	30-60mT
EV441A	119.508	55.5173	31.5362	12.3357	2	2	20-60mT
EV451A	50.5321	86.6039	81.254	3.13855	2	2	20-40mT
EV461A	203.575	-22.2494	36.6001	29.4192	2	2	20-60mT
EV461A	203.575	-22.2494	36.6001	29.4192	2	2	20-60mT
EV471A	183.813	58.7187	25.6194	11.9694	3	2	20-40mT
EV481A	85.6421	69.338	28.1033	7.69934	2	2	20-40mT
EV491A	349.177	40.4869	237.074	3.41646	2	2	20-60mT
EV501A	216.747	55.4909	106.43	5.36607	2	2	20-80mT
EV511A	277.052	65.9798	33.2011	8.40134	2	2	15-80mT
EV521A	338.141	-66.2328	39.2056	14.824	2	1	20-100mT
EV531A	153.663	72.36	34.6387	16.6382	2	2	30-80mT
EV541A	214.471	-34.5627	66.5665	12.9159	2	2	30-80mT
EV551A	24.2732	-0.729453	94084.1	7.64853	2	1	30-100mT
EV561A	230.124	-3.099	46.7661	7.72506	2	1	30-100mT
EV571A	18.4808	-8.10317	213.301	2.6699	2	2	30-100mT
EV581A	218.93	0.15339	23.3226	9.25379	2	2	30-80mT
EV591A	32.7382	71.7504	19.7969	11.2328	2	2	60-80
EV601A	108.614	52.8251	12.8663	19.2963	2	2	30-60
EV611A	186.186	-53.0748	117.925	4.94691	2	2	20-60mT
EV621A	342.18	45.327	63.8934	10.2035	2	2	20-60mT
EV631A	235.077	-14.1634	31.6349	14.5691	3	2	40-100mT
EV641A	131.223	-55.1729	51.6408	11.2135	2	2	40-80mT
EV661A	253.022	52.2885	18.5243	10.8956	2	2	30-60mT
EV671A	228.696	-37.0549	50.0194	7.24994	2	2	15-60mT
EV681A	133.432	55.5331	29.8824	19.7933	2	2	30-60mT
EV691A	98.9334	23.0959	13.0114	18.0358	2	2	15-30mT
EV701A	220.533	-32.5085	34.3907	12.4169	2	2	20-60mT
EV711A	56.3389	31.9785	90.5698	12.2822	2	2	60-100mT
EV721A	23.5902	74.5004	24.1241	16.8655	1	1	60-80mT
EV731A	359.023	-34.5307	27.5288	8.26722	1	1	60-100mT
EV741A	161.707	42.7409	7.66545	17.4129	2	2	40-80mT
EV751A	15.7942	45.6529	51.4355	19.9386	2	2	30-60mT
EV771A	18.2355	1.52666	9.67028	20.3272	2	2	30-100mT
EV781A	145.308	40.069	35.0291	10.3788	2	2	20-60mT
EV791A	17.4293	-33.6728	50.9429	7.32193	2	1	60-100mT
EV801A	312.714	42.321	10.6575	11.5134	2	2	40-80mT
EV811A	228.903	-14.3447	38.6092	8.78898	2	1	30-100mT
EV821A	278.464	33.142	186.933	8.31297	2	2	15-60mT
EV831A	118.589	-53.1842	20.6499	16.8268	2	2	40-80mT
EV841A	217.304	-46.6129	14.5295	20.1656	2	2	40-80mT
EV851A	235.584	39.4534	1124.01	7.23973	1	1	40-100mT
EV851A	235.584	39.4534	1124.01	7.23973	1	1	40-100mT
EV861A	9.23058	20.3724	89.5804	5.20163	2	2	30-80mT
EV871A	215.556	55.7383	21.6779	13.8589	1	1	40-100mT
EV881A	345.481	-60.5605	12.1553	25.5117	3	2	30-60mT
EV891A	104.623	62.367	127.095	4.75522	2	2	30-80mT
EV901A	34.8213	74.0116	38.0935	12.3181	1	1	20-100mT
EV911A	133.384	-47.4491	19.3359	10.891	2	2	15-60mT
EV921A	154.753	-41.7307	7.16985	26.5284	2	2	30-60mT
EV931A	319.972	53.6052	57.5829	5.4078	1	1	30-100mT
EV941A	113.831	32.0589	45.039	9.05217	2	2	20-60mT
EV941A	113.831	32.0589	45.039	9.05217	2	2	20-60mT
EV951A	220.99	-28.3496	47.2442	8.60599	2	2	30-100mT
EV961A	72.185	76.2089	31.7628	9.33148	1	2	40-100mT
EV971A	39.9791	61.8249	9.57612	22.0585	2	2	0-60mT
EV981A	338.963	14.4889	6.77152	25.0845	2	2	20-40mT
EV991A	118.989	-8.34301	14.4738	8.72571	2	2	20-40mT
EV100A	205.256	-46.7967	9.4275	27.9032	2	2	20-40mT
EV102A	323.175	-21.0575	48.4083	5.39719	6	1	60-100mT
EV103A	311.272	-49.7679	18.6622	11.9331	2	1	40-100mT
EV104A	180.665	-31.7661	58.0773	10.6723	1	2	20-80mT
EV106A	181.713	-87.2378	84.5576	7.57938	3	2	15-30mT
EV108A	222.683	28.6782	30.3779	17.969	2	2	15-30mT
EV109A	263.17	19.9621	14.9514	11.1064	2	2	20-60mT
EV110A	222.367	26.2394	50.0664	7.54202	2	2	20-60mT
EV111A	307.683	62.6793	329.873	4.59105	2	1	30-100mT
EV113A	3.34025	30.9241	270.764	4.61641	2	2	20-80mT
EV114A	120.259	12.6442	68.1892	2.11737	2	2	15-30mT
EV115A	54.0911	8.37455	87.6056	4.94997	2	2	15-30mT
EV116A	6.96867	-40.3032	29.3276	5.8083	2	2	15-30mT
