# Supplementary material for: Temperate Oligocene surface ocean conditions offshore Cape Adare, Ross Sea, Antarctica
Source: Copernicus journal article supplement (doi:10.5194/cp-2020-139), 2020-11-27
Supplement: Supplementary file 4 [file Supplementary table S4.xlsx]

## Sheet: CA
Supplementary table S4: Correspondance analysis (CA) scores
Properties	Code	Name	Relative accumulated abundance %	CA Axis 1	CA Axis 4	CA Axis 3	CA Axis 4	CA Axis 5
		*Eigenvalue		0.310911	0.152885	0.095571	0.051943	0.0495422
in situ	Ac alc	Achomosphaera alcicornu	0.0124406	-0.614829	0.122141	-1.32896	0.857932	0.359683
in situ	Ba com	Batiacasphaera compta	0.0457115	-0.451828	0.601952	-0.510615	0.0725063	-0.626009
in situ	Ba coo	Batiacasphaera cooperi	0.00579945	-1.11964	-0.0920068	2.96707	-1.57266	2.49837
in situ	Ba spB	Batiacasphaera sp# B sensu Bijl et al#, 2018	3.65516	0.366036	1.75862	-0.0302682	-0.223273	-0.179108
in situ	Ba spA	Batiacasphaera sp#A	1.42697	-0.634631	-0.265768	-0.411075	0.316614	-0.356032
in situ	Ba spp	Batiacasphaera spp# Pars	5.78085	-0.332187	0.083822	-0.398569	-0.0174717	0.207708
in situ	Br pyn	Brigantedinium pynei	0.141469	-0.92815	-0.550057	0.739583	-0.27829	-0.359957
in situ	Br sim	Brigantedinium simplex	0.0290554	-1.13571	-0.179217	2.00795	-1.03772	1.69553
in situ	Br spp	Brigantedinium spp# pars#	2.58644	-0.150031	-0.0976939	0.077472	0.0638727	-0.0495643
in situ	Cer spp	Cerebrocysta spp# Pars	1.49805	-0.413415	0.306813	-0.210835	0.130445	-0.0271465
in situ	Cl spA	Cleistosphaeridium sp A# sensu Bijl et al#, 2018	0.0295041	0.412357	1.27551	0.92682	1.54489	-0.400716
in situ	Co lab	Corrudinium labradori	0.381015	-0.337105	0.267333	0.241083	0.387706	-0.364705
in situ	Co spp	Corrudinium spp# Pars	0.105119	0.623353	-0.440447	-0.423287	-0.606702	-0.583641
in situ	Dino sp1	Dinocyst sp. 1	3.22884	0.667628	-0.255163	-0.157327	-0.196152	0.230905
in situ	G inf	Gelatia inflata	0.134183	-0.222141	-0.062576	0.62591	-0.360463	0.28221
in situ	Hy bul	Hystrichokolpoma bullatum	0.18504	1.17985	-0.368265	0.0133034	-0.429962	-0.507877
in situ	I can	Impagidinium cantabrigiense	0.00597836	-0.831827	-0.430366	0.289239	0.614632	0.348014
in situ	I acu	impagidinium cf aculeatum	0.0709993	-0.696558	-0.0820632	-0.012663	-0.301011	-0.501604
in situ	I pal	Impagidinium pallidum	0.351572	-0.047648	0.315758	-0.0189974	0.266883	-0.184745
in situ	I par	Impagidinium paradoxum	0.131335	-0.252005	0.186765	0.334	-0.489114	0.242929
in situ	I spA	Impagidinium sp# A sensu Bijl et al#, 2018	0.108002	0.21351	-0.460588	-0.154051	-0.415616	-0.145956
in situ	I vel	Impagidinium velorum	0.0441443	-0.244064	0.729958	-0.749274	-0.687323	0.252573
in situ	I vic	Impagidinium victorium	0.143611	0.337825	-0.271988	0.32463	0.697926	0.303097
in situ	L spA	Lejeuenacysta sp# A	0.930049	-0.398441	-0.075066	0.144667	0.268419	-0.0916005
in situ	L acu	Lejeunecysta acuminata	0.634558	-0.307521	0.251915	0.27049	-0.0395151	0.208455
in situ	L Ade	Lejeunecysta adeliensis	0.0790763	-0.439533	-0.160057	0.129879	0.0277225	0.0534162
in situ	L Att	Lejeunecysta attenuata	0.00993733	-1.23518	-0.428401	0.804569	-0.44512	0.0898311
in situ	L Fal	Lejeunecysta fallax	0.136513	-0.145634	0.594767	0.756106	0.275773	0.11128
in situ	L Kat	Lejeunecysta katatonos	0.0372901	-0.594935	0.108314	1.14783	-0.22869	0.377696
in situ	L rot	Lejeunecysta rotunda	0.055052	0.0374929	1.01174	1.29673	-0.262466	1.06225
in situ	L spp	Lejeunecysta spp#pars	0.749264	0.160581	-0.271835	0.178165	-0.340542	-0.22326
in situ	M esc	Malvinia escutiana	7.15346	-0.332869	0.00198087	-0.0798887	-0.150951	0.0589763
in situ	N lab	Nematosphaeropsis labyrinthus	0.0819456	1.22712	-0.399945	0.156424	-0.384671	1.17769
in situ	O cen	Operculodinium centrocarpum	0.0303864	-0.518193	-0.480071	1.9461	0.210223	0.342449
in situ	O eir	Operculodinium eirikianum	0.993335	-0.936692	-0.264487	0.70793	-0.52908	-0.21677
in situ	O jan	Operculodinium janduchenei	0.0258226	-1.13215	-0.358511	2.32835	-1.30772	1.32766
in situ	O pia	Operculodinium piasekii	0.0391258	0.531008	2.30087	0.354647	0.828949	-0.335338
in situ	O spA	Operculodinium sp# A sensu Bijl et al#, 2018	0.0909045	-0.575453	-0.185651	-0.430516	-0.036502	-0.329585
in situ	O spp	Operculodinium spp# Pars	0.238241	-0.551841	-0.404727	-0.312817	0.514522	0.236167
in situ	Prot	Protoperidinium indet#	0.089897	0.707554	1.66746	0.597512	0.394405	-0.16916
in situ	Pyx spp	Pyxidinopsis spp	5.08566	-0.244746	-0.0367905	-0.390485	0.0562829	0.124634
in situ	Se ant	Selenopemphix antarctia	0.0793656	0.697713	0.418804	0.547122	0.648297	0.452147
in situ	Se bri	Selenopemphix brinkhusii	0.252684	-0.840851	-0.0772205	0.45387	-0.149005	-0.458796
in situ	Se nep	Selenopemphix nephroides	0.0671417	-0.833654	-0.472021	1.36295	-0.0846096	0.345449
in situ	Se spp	Selenopemphix spp# pars	0.168736	0.452759	-0.00480331	-0.205709	-0.605366	0.135486
in situ	Sf ram	Spiniferites ramous	0.619653	0.212608	-0.00127001	0.269054	0.107301	-0.0241688
in situ	Sf bul	Spiniferites bulloideus	0.0208394	0.436615	0.510771	-0.87075	-1.71099	0.977074
in situ	Sf spp	Spiniferites spp# pars	0.483673	0.462983	-0.352972	0.064159	-0.00639178	-0.525142
in situ	St kak	Stoveracysta kakanuiensis	0.0343776	0.639475	0.573968	0.701412	1.22213	-0.580626
in situ	St orn	Stoveracysta ornata	0.0548353	1.1373	0.095454	0.925239	1.57427	0.229435
Reworked	A ant	Arachnodinium antarcticum	1.02988	0.0870816	-0.0475507	-0.175279	-0.285054	-0.525088
Reworked	Cer RW	Cerebrocysta spp# Pars RW	0.122371	-0.85786	-0.577306	0.35792	-0.0945423	-0.769604
Reworked	Al dis	Alterbidinium distinctum	0.049676	0.230998	-0.14673	-0.0855695	0.104449	0.0656976
Reworked	Co inc	Corrudinium incompositum	0.089089	0.44417	0.0102383	0.771104	0.426813	0.600268
Reworked	Co reg	Corrudinium regulare	0.0449785	0.304935	1.13451	0.627679	1.46526	0.419539
Reworked	Df spp	Deflandrea spp# Pars	7.85607	0.124032	-0.165798	-0.0033972	0.0877083	0.0462987
Reworked	Enn spp	Enneadocysta spp# Pars	2.78828	0.0481831	0.112124	-0.0133913	-0.101765	0.0086159
Reworked	H rig	Hystrichokolpoma rigaudiae	0.0833834	0.0416395	0.457114	-0.155927	0.175381	-0.638193
Reworked	Hy tru	Hystrichosphaeridium truswelliae	0.0934497	-0.662761	-0.38246	0.160272	0.0906076	0.535124
Reworked	I RW	Impagidinium spp# Pars RW	0.0490965	-0.928185	0.321859	0.730583	-0.59169	-1.36549
Reworked	M zac	Moria zachosii	0.206821	-0.0108244	-0.449617	-0.135322	0.431928	0.299922
Reworked	Ope RW	Operculodinium spp# RW	0.284148	1.24877	-0.14738	-0.0816512	-0.717896	-0.469144
Reworked	otr-G	Other G-cyst reworked	0.0834253	0.247172	-0.444529	-0.0171352	-0.31892	-1.04042
Reworked	otr-P	Other P-cyst reworked	0.0166528	1.33666	0.169272	-0.105326	-0.269341	-0.215767
Reworked	P lat	Pentadinium laticinctum	0.232418	0.261976	0.0344026	0.0270623	-0.11872	-0.0363549
Reworked	Ph spp	Phthanoperidinium spp# Pars	6.31308	0.610974	-0.108442	0.08225	0.0304507	0.0664072
Reworked	Sen spp	Senegalinium spp#	1.77369	0.429437	-0.0558614	0.0824438	0.000608918	0.0582327
Reworked	Spd spp	Spinidinium spp	1.73509	0.399437	-0.12027	0.010684	0.0072814	-0.0043686
Reworked	Th pel	Thalassiphora pelagica	0.17267	-0.101786	-0.490696	-0.13048	0.294808	0.238737
Reworked	T van	Tuberculodinium vancampoae	0.0563818	0.883282	-0.26504	-0.116153	-0.506417	-1.16979
Reworked	Tur spp	Turbiosphaera spp# Pars RW	0.164747	0.107468	0.201106	0.280212	-0.51481	-0.343581
Reworked	Voz spp	Vozzhennikovia spp# Pars	7.05109	0.389579	-0.185793	0.0384075	0.0250487	0.0618426
unidentified	Indet 1	unidentified	0.233056	-0.0760166	-0.299243	0.413439	0.595675	-0.632064
unidentified	indet 2	unidentified 2	0.496577	0.121621	-0.596674	-0.0614027	0.335804	-0.153189
unidentified	indet 3	unidentified 3	6.65493	-0.147574	0.313792	-0.219709	-0.0305766	0.141043
terrestrial	Terr	Terrestrial	2.28132	0.0797451	-0.113994	0.0452953	0.040579	-0.0553032
Acritarch	Ptero	Pterospermella/green algea	0.282803	-0.024574	0.208804	0.221904	-0.112963	-0.0877799
Acritarch	Acrit spp	Acritarch spp	0.705888	0.305386	0.0648424	0.27299	0.39903	-0.321065
Acritarch	Acri spiney	Acritarch spiney spp	16.4852	-0.279535	0.058707	0.0232452	0.0169365	-0.0250873
Acritarch	Leios	Leiosphaeridia	0.423234	-0.0602948	-0.253861	-0.285469	-0.201554	0.0135253
Acritarch	Cym Spp	Cymatosphaera spp# Pars	3.7974	-0.21004	-0.0418318	-0.00459264	-0.0692063	0.0189568
