# Supplementary figures and images for: Temperate Oligocene surface ocean conditions offshore Cape Adare, Ross Sea, Antarctica
Source: Copernicus journal article supplement (doi:10.5194/cp-2020-139), 2020-11-27

Figure S1

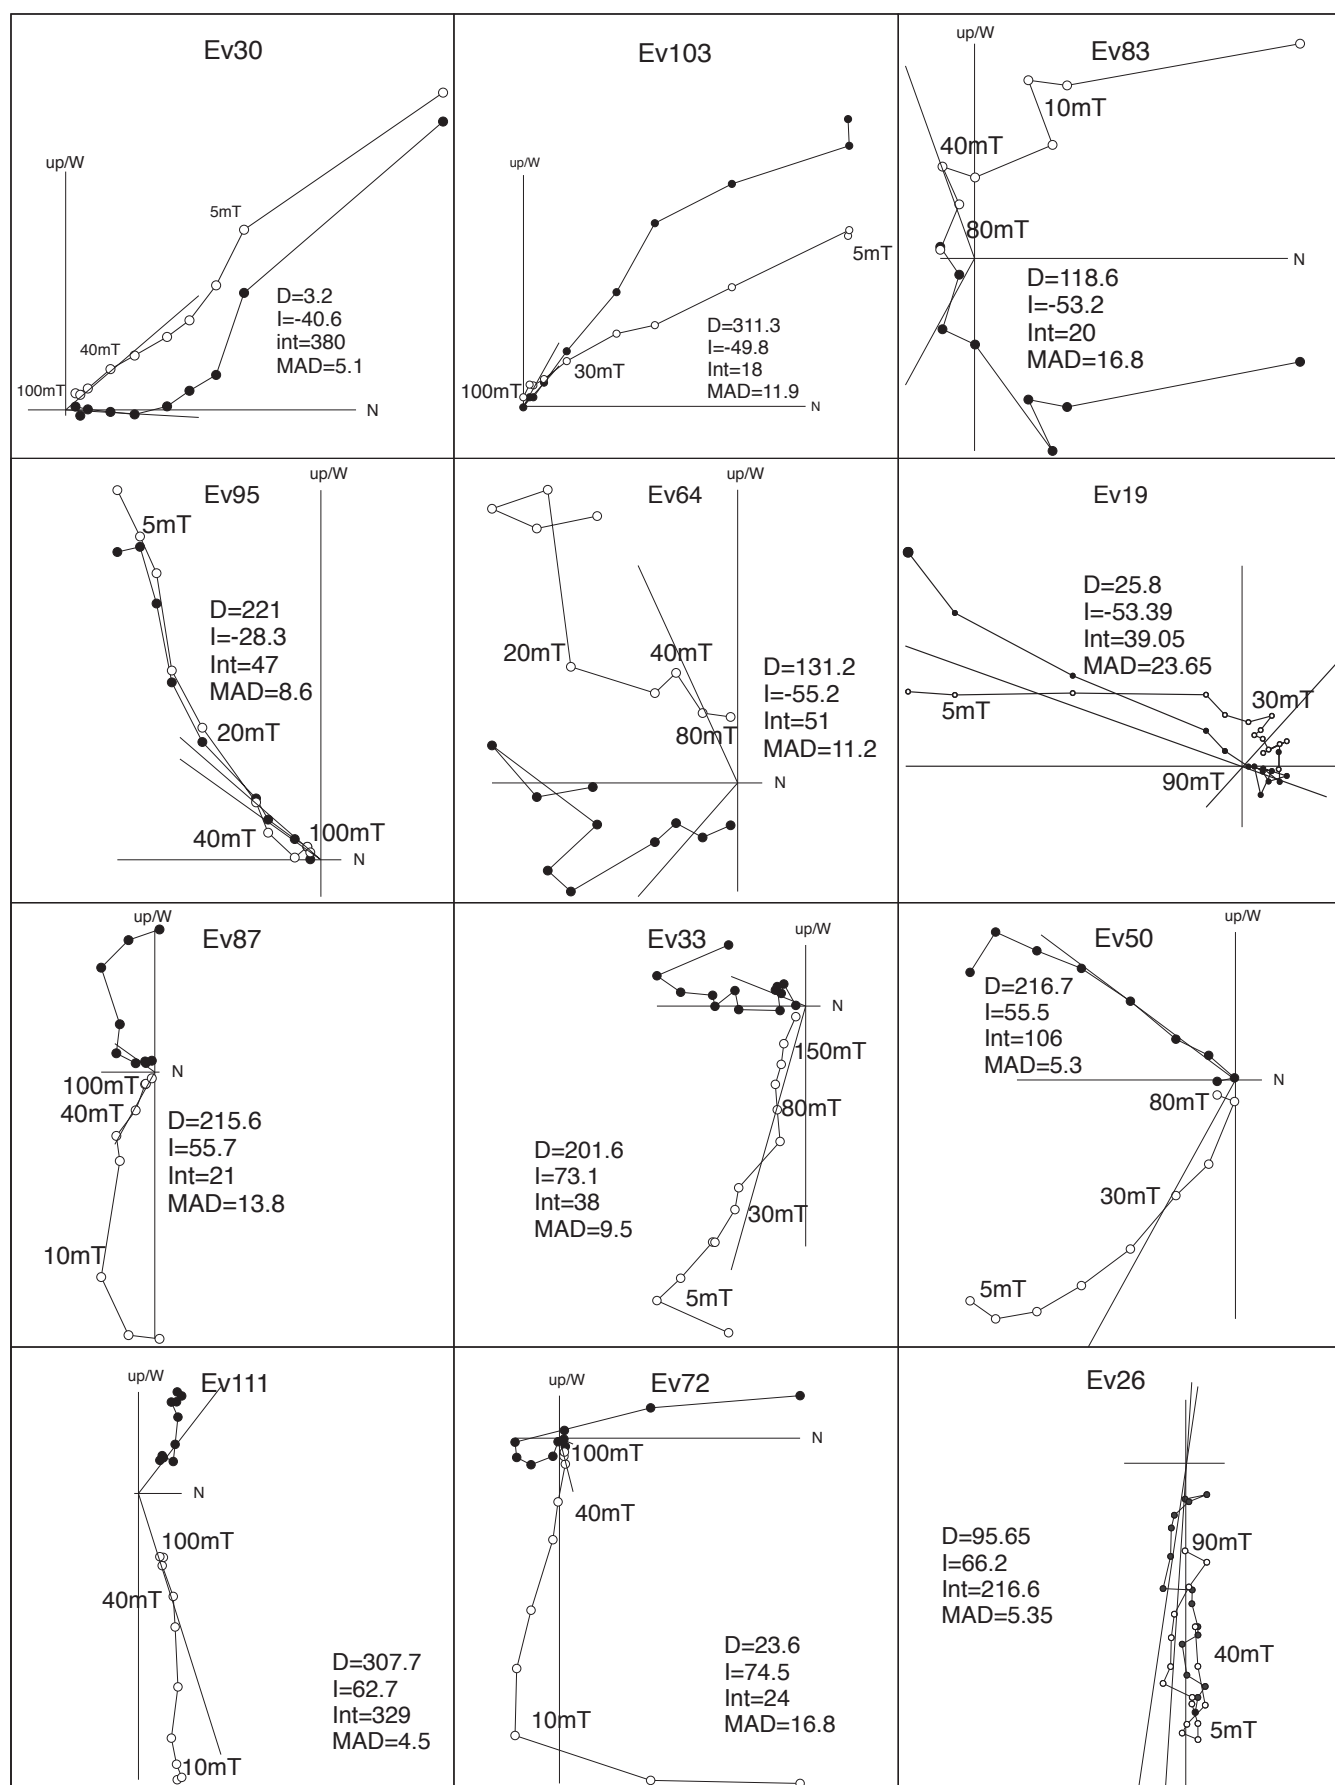

Supplement: Supplementary file 1 [file Sup.fig01.pdf › Sup.fig01.pdf]

Figure S2

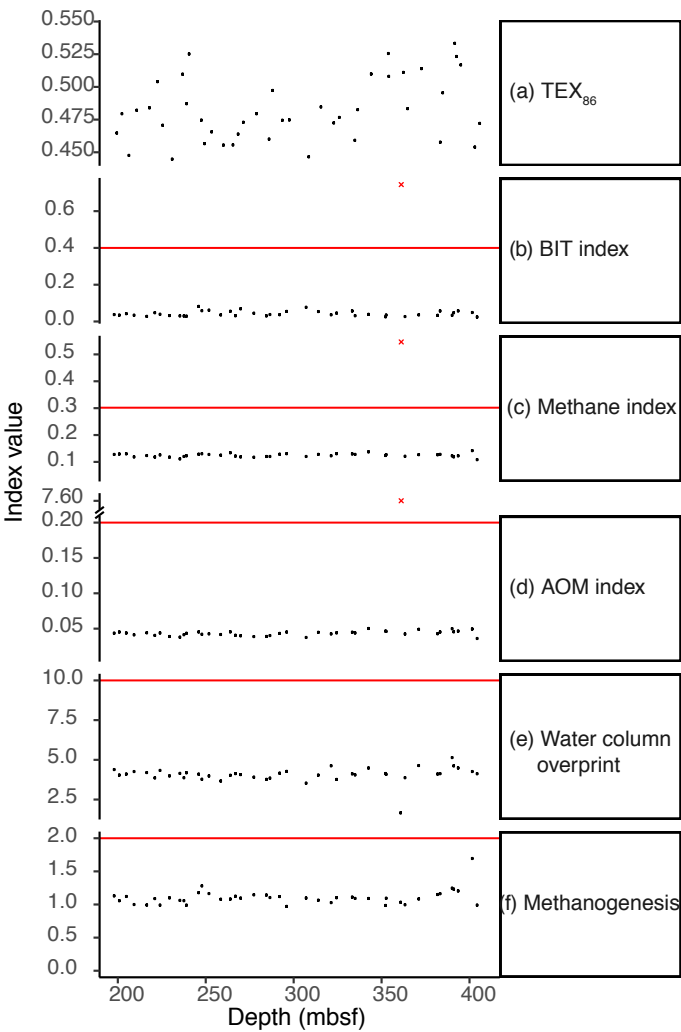

Supplement: Supplementary file 2 [file Sup.fig02.pdf › Sup.fig02.pdf]

Figure S3

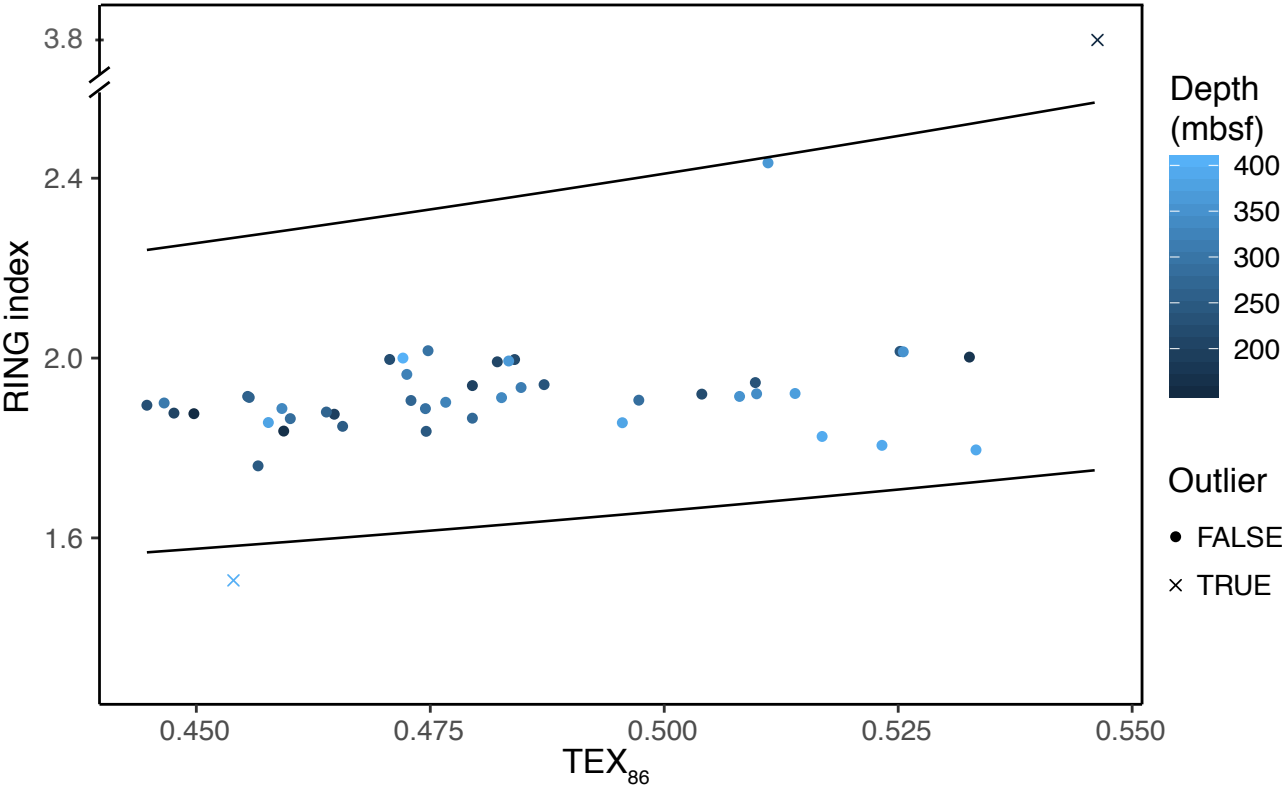

Supplement: Supplementary file 3 [file Sup.fig03.pdf › Sup.fig03.pdf]
